# Supplementary material
Source: MDPI journal article supplement (https://www.mdpi.com/2673-6357/5/1/6)
Supplement: s1 [file s1]

**Table S1.** Mean values for blood and immunohistochemistry.

| Parameter/stage                         | Wild-type mean | VWD Type 1 mean |
|-----------------------------------------|----------------|-----------------|
| <b>VWF:GPIbM (%)</b>                    |                |                 |
| Before Implantation                     | 134            | 71              |
| Early pregnancy                         | 108            | 70              |
| Mid pregnancy                           | 106            | 70              |
| Late pregnancy                          | 144            | 84              |
| Proestrus                               | 99             | 83              |
| Oestrus                                 | 109            | 78              |
| Metoeustrus                             | 105            | 79              |
| Dioestrus                               | 122            | 76              |
| <b>FVIII:C (%)</b>                      |                |                 |
| Before Implantation                     | 247            | 224             |
| Early pregnancy                         | 243            | 223             |
| Mid pregnancy                           | 251            | 199             |
| Late pregnancy                          | 272            | 226             |
| Proestrus                               | 219            | 180             |
| Oestrus                                 | 265            | 189             |
| Metoeustrus                             | 224            | 155             |
| Dioestrus                               | 216            | 162             |
| <b>C/EPI (seconds)</b>                  |                |                 |
| Before Implantation                     | 170            | 263             |
| Early pregnancy                         | 148            | 270             |
| Mid pregnancy                           | 231            | 300             |
| Late pregnancy                          | 199            | 242             |
| <b>C/ADP (seconds)</b>                  |                |                 |
| Before Implantation                     | 78             | 155             |
| Early pregnancy                         | 95             | 145             |
| Mid pregnancy                           | 111            | 136             |
| Late pregnancy                          | 85             | 104             |
| <b>P2Y (seconds)</b>                    |                |                 |
| Before Implantation                     | 52             | 92              |
| Early pregnancy                         | 52             | 105             |
| Mid pregnancy                           | 58             | 114             |
| Late pregnancy                          | 53             | 90              |
| <b>IHC ovary (% of positive cells)</b>  |                | /               |
| Proestrus                               | 28.3           |                 |
| Oestrus                                 | 23.8           |                 |
| Metoeustrus                             | 33.2           |                 |
| Dioestrus                               | 28.1           |                 |
| juvenile                                | 25.9           |                 |
| <b>IHC uterus (% of positive cells)</b> |                | /               |
| Proestrus                               | 31.0           |                 |
| Oestrus                                 | 28.8           |                 |
| Metoeustrus                             | 33.0           |                 |
| Dioestrus                               | 26.1           |                 |
| juvenile                                | 29.0           |                 |

**Table S2.** Fractions of Multimers during pregnancy

|                   | LMWM %<br>VWD T1 | IMWM %<br>VWD T1 | HMWM %<br>VWD T1 | LMWM %<br>WT | IMWM %<br>WT | HMWM %<br>WT |
|-------------------|------------------|------------------|------------------|--------------|--------------|--------------|
| Individual 1 T0   | 38.4             | 12.7             | 48.9             | 12.3         | 16.6         | 71.7         |
| Individual 2 T0   | 11.4             | 19.1             | 69.5             | 14.4         | 13.5         | 72.1         |
| Individual 1 T35  | 25               | 18.9             | 56.1             | 21           | 32.3         | 46.7         |
| Individual 2 T35  | 11.2             | 23               | 65.8             | 10.1         | 14.2         | 75.7         |
| Individual 1 T63  | 31.4             | 19.4             | 49.2             | 13.2         | 18.9         | 67.9         |
| Individual 2 T63  | 10.8             | 19.6             | 69.6             | 11.9         | 25.2         | 62.9         |
| Individual 1 T77  | 18.9             | 12.4             | 68.7             | 19.5         | 27           | 53.5         |
| Individual 2 T77  | 16.8             | 17.2             | 66               | 8.7          | 25           | 66.3         |
| Individual 1 T91  | 25.3             | 12.9             | 61.8             | 12.6         | 21.4         | 66           |
| Individual 2 T91  | 17.8             | 20.2             | 62               | 11.9         | 23.5         | 64.6         |
| Individual 1 T105 | 18.9             | 26               | 55.1             | x            | x            | x            |
| Individual 2 T105 | 17.8             | 27.2             | 55               | x            | x            | x            |

LMWM: Low molecular weight multimers; IMWM: intermediate molecular weight multimers; HMWM: high molecular weight multimers; Tn: Day n; VWD T1: von Willebrand Disease Type 1; WT: wildtype
